# Supplementary material for: An Open Label Non-inferiority Trial Assessing Vibriocidal Response of a Killed Bivalent Oral Cholera Vaccine Regimen following a Five Year Interval in Kolkata, India
Source: PubMed Central journal article supplement (PMC4449043; doi:10.1371/journal.pntd.0003809), 2015-05-29
Supplement: pntd.0003809.s003.pdf [file pntd.0003809.s003.pdf]

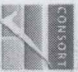

# CONSORT 2010 checklist of information to include when reporting a randomised trial\*

| Section/Topic             | Item No | Checklist item                                                                                                                                                                              | Reported on page No |
|---------------------------|---------|---------------------------------------------------------------------------------------------------------------------------------------------------------------------------------------------|---------------------|
| <b>Title and abstract</b> | 1a      | Identification as a randomised trial in the title                                                                                                                                           | NA                  |
|                           | 1b      | Structured summary of trial design, methods, results, and conclusions (for specific guidance see CONSORT for abstracts)                                                                     | 3                   |
| <b>Introduction</b>       | 2a      | Scientific background and explanation of rationale                                                                                                                                          | 5                   |
|                           | 2b      | Specific objectives or hypotheses                                                                                                                                                           | 5                   |
| <b>Methods</b>            | 3a      | Description of trial design (such as parallel, factorial) including allocation ratio                                                                                                        | 6                   |
|                           | 3b      | Important changes to methods after trial commencement (such as eligibility criteria), with reasons                                                                                          | NA                  |
| <b>Participants</b>       | 4a      | Eligibility criteria for participants                                                                                                                                                       | 6                   |
|                           | 4b      | Settings and locations where the data were collected                                                                                                                                        | 6                   |
| <b>Interventions</b>      | 5       | The interventions for each group with sufficient details to allow replication, including how and when they were actually administered                                                       | 6-8                 |
| <b>Outcomes</b>           | 6a      | Completely defined pre-specified primary and secondary outcome measures, including how and when they were assessed                                                                          | 6                   |
| <b>Section 6b</b>         | 6b      | Any changes to trial outcomes after the trial commenced, with reasons                                                                                                                       | NA                  |
|                           | 7a      | How sample size was determined                                                                                                                                                              | 8                   |
|                           | 7b      | When applicable, explanation of any interim analyses and stopping guidelines                                                                                                                | NA                  |
| <b>Randomisation:</b>     | 8a      | Method used to generate the random allocation sequence                                                                                                                                      | NA                  |
|                           | 8b      | Type of randomisation; details of any restriction (such as blocking and block size)                                                                                                         | NA                  |
|                           | 9       | Mechanism used to implement the random allocation sequence (such as sequentially numbered containers), describing any steps taken to conceal the sequence until interventions were assigned | NA                  |
| <b>Method concealment</b> | 10      | Who generated the random allocation sequence, who enrolled participants, and who assigned participants to interventions                                                                     | NA                  |
|                           | 11a     | If done, who was blinded after assignment to interventions (for example, participants, care providers, those                                                                                | NA                  |
